# Supplementary material for: Sexual dimorphic gene expression profile of perirenal adipose tissue in ovine fetuses with growth restriction
Source: Front Physiol. 2023 Aug 4;14:1179288. doi: 10.3389/fphys.2023.1179288 (PMC10437077; doi:10.3389/fphys.2023.1179288)
Supplement: Supplementary file 8 [file Table5.XLSX]

## Sheet: MC-FC_GO_Genes
	MC1	MC2	MC3	MC4	FC1	FC2	FC3	FC4	Pathways	adj.Pval	Direction	Genes
9.29e-04 Fatty acid beta-oxidation using acyl-CoA dehydrogenase	-1.37122	-1.25016	-1.15133	-0.880804	1.23175	1.32545	1.10509	0.963506	Fatty acid beta-oxidation using acyl-CoA dehydrogenase	0.000929	Diff	GCDH ETFDH ETFA ETFB ACADS
9.29e-04 Protein localization to endosome	-1.22271	-1.32271	-0.905796	-1.22708	1.01249	1.06478	1.36051	1.17752	Protein localization to endosome	0.000929	Diff	PACSIN2 VPS35 AKAP11 ROCK2 TMEM30A RDX RAB35 ARF6 ANKRD13A MSN
7.82e-04 Early endosome to late endosome transport	-1.08491	-1.23475	-0.886575	-1.22658	1.19191	1.06816	1.23308	1.04257	Early endosome to late endosome transport	0.000782	Diff	RAB5A DNAJC13 CHMP3 RAB21 AKTIP SNX3 PTPN23 RDX PIK3C3 EMP2 RAB7A FLNA BECN1 MSN
8.81e-04 Regulation of early endosome to late endosome transport	-1.12249	-1.10705	-1.00429	-0.997008	1.33124	0.954704	1.13842	0.936575	Regulation of early endosome to late endosome transport	0.000881	Diff	DNAJC13 CHMP3 RAB21 SNX3 PTPN23 RDX MSN
2.39e-04 Adiponectin-activated signaling pathway	0.859166	0.982985	0.853938	0.836881	-0.913661	-0.982114	-0.777674	-0.894348	Adiponectin-activated signaling pathway	0.000239	Diff	ACSL1 APPL2 AdpR2 APPL1 ADIPOR1
