# Supplementary material for: Sexual dimorphic gene expression profile of perirenal adipose tissue in ovine fetuses with growth restriction
Source: Front Physiol. 2023 Aug 4;14:1179288. doi: 10.3389/fphys.2023.1179288 (PMC10437077; doi:10.3389/fphys.2023.1179288)
Supplement: Supplementary file 9 [file Table7.XLSX]

## Sheet: MC-MFGR_GO_List
	MC1	MC2	MC3	MC4	MFGR1	MFGR2	MFGR3	MFGR4	Pathways	adj.Pval	Direction	Genes
1.03e-01 Ribosomal large subunit assembly	-1.03522	-1.65368	-1.84577	-2.24433	3.28072	1.73213	0.952612	2.8589	Ribosomal large subunit assembly	0.103	Diff	RPL24 NOP2 MRTO4 NOP53 RPL11 FASTKD2 DHX30 RPL38
1.03e-01 Biosynthetic process	-1.09689	-2.32898	-2.45298	-1.20788	2.90308	1.25091	2.0036	0.945981	Biosynthetic process	0.103	Diff	ATP6 NFYC HACD2 MMACHC PPCS CDK4 PTCD3 PAXBP1 AKR1A1 GFM1 EFEMP1 KAT2B PNPT1 HOXA5 HOXD8 PPP4R3B MRPL35 IRF1 CBX3 TRAF2 ABCD3 HNRNPA2B1 ADIPOQ RFC4 CD200 CDK13 GPBP1L1 ETAA1 ENSOARG00020000483 NFIL3 ATP5MC3 POMT1 TECR LPL SPTLC1 CYP1B1 DNAJB1 ENSOARG00020000678 ZNF596 PKN1 ACTR2 MTIF2 RPS27A CEBPZ POLDIP3 CYB5R3 ENSOARG00020000853 POMGNT1 eIF2aK2 PIN1 ENSOARG00020000903 ELOVL1 MCAT ENSOARG0002000…
1.03e-01 Cardiac muscle hypertrophy	1.47218	1.31257	2.21303	0.730463	-0.342341	-1.28383	-1.35676	-1.72927	Cardiac muscle hypertrophy	0.103	Diff	KDM4A MTPN NOTCH1 ATP2B4 TNFRSF1A ROCK1 IGF1 PPP3CA P2RX4ENSOARG00020013935 ATP2A2 INPP5F SMAD4 ENSOARG00020020722 BECN1 PI16 CAMTA2
1.03e-01 Response to oxidative stress	-1.95841	-0.964759	-1.4108	-1.07512	0.99998	1.90667	0.551794	1.13632	Response to oxidative stress	0.103	Diff	STK25 PRDX1 PNPT1 NDUFA6 PYROXD1 ADIPOQ CYP1B1 ABL1 SOD1 TXN HTRA2 ZNF277 MGST1 NDUFB4 PDCD10 TXNIP UBQLN1 APP KEAP1 ROMO1 APOE SOD2 RIPK1 SIRT1 MAPKAP1 ERCC2 ERCC1 SMPD3 PRDX5 GPX7 ERCC3 SELENON MCL1 MMP2 TPM1 H2AFY SFPQ ARNT KDM6B PPARGC1B DIABLO HIF1A PSEN1 PDK2 TP53 ANKZF1 NOS3 CAT NAPRT UCP1 FZD1 ATF4 GSKIP NDUFA12 HYAL1 PRDX6 CHD6 NDUFS8 ATP2A2 PRDX3 GPX3 ZNF622 GPX4 MAPK3 PDGFRA VKORC1L1 O…
3.25e-02 Cell adhesion mediated by integrin	0.967854	1.24327	1.17297	0.815081	-0.884492	-1.15047	-1.43792	-1.03912	Cell adhesion mediated by integrin	0.0325	Diff	CYP1B1 ICAM1 PTK2 CCL21 FBN1 EFNA1 COL16A1 ADAM17 EXT1 ADA YWHAE PIEZO1 WNK1 EPHA2 ENSOARG00020016394 SWAP70 PTPN11 RET SKAP1 ADAM9 ITGB1 PTPN6 PLAU RAC3 CRKL
